# Supplementary material
Source: ML conference proceedings conference paper supplement (https://proceedings.mlr.press/v119/lin20h.html)
Supplement: Supplementary file [file lin20h-supp.pdf]

## A. Convergence under Imperfect Feedback with Absolute Random Noise

In this section, we analyze the convergence of OGD-based learning on  $\lambda$ -cocoercive games under imperfect feedback with absolute random noise (4). We first establish that OGD under noisy feedback converges almost surely in last-iterate to the set of Nash equilibria of a co-coercive game if  $\sigma_t^2 \in (0, \sigma^2)$  for some  $\sigma^2 < +\infty$  and the finite-time  $O(1/\sqrt{T})$  convergence rate on  $(1/T)\mathbb{E}[\sum_{t=0}^T \epsilon(\mathbf{x}_t)]$  under properly diminishing step-size sequences. We also present a finite-time convergence rate on  $\mathbb{E}[\epsilon(\mathbf{x}_T)]$  if  $\sigma_t^2$  satisfies certain conditions.

### A.1. Almost Sure Last-Iterate Convergence

We start by developing a key iterative formula for  $\mathbb{E}[\epsilon(\mathbf{x}_t)]$  in the following lemma.

**Lemma A.1** Fix a  $\lambda$ -cocoercive game  $\mathcal{G}$  with a continuous action space,  $\mathcal{G} = (\mathcal{N}, \mathcal{X} = \prod_{i=1}^N \mathbb{R}^{n_i}, \{u_i\}_{i=1}^N)$ , and let the set of Nash equilibria,  $\mathcal{X}^*$ , be nonempty. Under the noisy model (2) with absolute random noise (4) and letting the OGD-based learning run with a step-size sequence  $\eta_t \in (0, \lambda)$ , the noisy OGD iterate  $\mathbf{x}_t$  satisfies

$$\mathbb{E}[\epsilon(\mathbf{x}_{t+1})] \leq \mathbb{E}[\epsilon(\mathbf{x}_t)] + \frac{\sigma_t^2}{\lambda\eta_{t+1}}.$$

We are now ready to establish last-iterate convergence in a strong, almost sure sense. Note that the conditions imposed on  $\sigma_t^2$  and  $\eta_t$  are minimal.

**Theorem A.2** Fix a  $\lambda$ -cocoercive game  $\mathcal{G}$  with a continuous action space,  $\mathcal{G} = (\mathcal{N}, \mathcal{X} = \prod_{i=1}^N \mathbb{R}^{n_i}, \{u_i\}_{i=1}^N)$ , and let the set of Nash equilibria,  $\mathcal{X}^*$ , be nonempty. Consider the noisy model (2) with absolute random noise (4) satisfying  $\sigma_t^2 \in (0, \sigma^2]$  for some  $\sigma^2 < +\infty$  and letting the OGD-based learning run with a step-size sequence satisfying

$$\sum_{t=1}^{\infty} \eta_t = +\infty, \quad \sum_{t=1}^{\infty} \eta_t^2 < +\infty.$$

Then the noisy OGD iterate  $\mathbf{x}_t$  converges to  $\mathcal{X}^*$  almost surely.

### A.2. Finite-Time Convergence Rate: Time-Average and Last-Iterate

For completeness, we characterize two types of rates: the time-average and last-iterate convergence rate, as formalized by the following theorems.

**Theorem A.3** Fix a  $\lambda$ -cocoercive game  $\mathcal{G}$  with a continuous action space,  $\mathcal{G} = (\mathcal{N}, \mathcal{X} = \prod_{i=1}^N \mathbb{R}^{n_i}, \{u_i\}_{i=1}^N)$ , and let the set of Nash equilibria,  $\mathcal{X}^*$ , be nonempty. Under the noisy model (2) with absolute random noise (4) satisfying  $\sigma_t^2 \in (0, \sigma^2]$  for some  $\sigma^2 < +\infty$  and letting the OGD-based learning run with a step-size sequence  $\eta_t = c/\sqrt{t}$  for some constant  $c \in (0, \lambda)$ , the noisy OGD iterate  $\mathbf{x}_t$  satisfies

$$\frac{1}{T+1} \left( \mathbb{E} \left[ \sum_{t=0}^T \epsilon(\mathbf{x}_t) \right] \right) = O \left( \frac{\log(T)}{\sqrt{T}} \right).$$

Inspired by Lemma A.1, we impose an intuitive condition on the variance of noisy process  $\{\sigma_t^2\}_{t \geq 0}$ . More specifically, there exists a function  $\alpha : \mathbb{R}^+ \rightarrow \mathbb{R}^+$  satisfying  $a(t) = o(1)$  and  $a(t) = \Omega(1/t)$  such that

$$\frac{1}{T+1} \left( \sum_{t=0}^{T-1} (t+1)\sigma_t^2 \right) = O(a(T)). \quad (15)$$

Under this condition, the noisy iterate generated by the OGD-based learning achieves the finite-time last-iterate convergence rate regardless of a sequence of possibly constant step-sizes  $\eta_t$  satisfying  $0 < \underline{\eta} \leq \eta_t \leq \bar{\eta} < \lambda$  for all  $t \geq 1$ .

**Theorem A.4** Fix a  $\lambda$ -cocoercive game  $\mathcal{G}$  with a continuous action space,  $\mathcal{G} = (\mathcal{N}, \mathcal{X} = \prod_{i=1}^N \mathbb{R}^{n_i}, \{u_i\}_{i=1}^N)$ , and let the set of Nash equilibria,  $\mathcal{X}^*$ , be nonempty. Under the noisy model (2) with absolute random noise (4) satisfying Eq. (15) and letting the OGD-based learning run with a nonincreasing step-size sequence satisfying  $0 < \underline{\eta} \leq \eta_t \leq \bar{\eta} < \lambda$  for all  $t \geq 1$ , the noisy OGD iterate  $\mathbf{x}_t$  satisfies

$$\mathbb{E}[\epsilon(\mathbf{x}_T)] = O(a(T)).$$

## B. Proof of Lemma 3.1

Since  $\mathcal{X}_i = \mathbb{R}^{n_i}$ , we have

$$\begin{aligned} & \|x_{i,t+2} - x_{i,t+1}\|^2 \\ &= \|x_{i,t+1} - x_{i,t} + \eta(v_i(\mathbf{x}_{t+1}) - v_i(\mathbf{x}_t))\|^2 \\ &= \|x_{i,t+1} - x_{i,t}\|^2 + 2\eta(x_{i,t+1} - x_{i,t})^\top (v_i(\mathbf{x}_{t+1}) - v_i(\mathbf{x}_t)) + \eta^2 \|v_i(\mathbf{x}_{t+1}) - v_i(\mathbf{x}_t)\|^2. \end{aligned}$$

Expanding the right-hand side of the above inequality and summing up the resulting inequality over  $i \in \mathcal{N}$  yields that

$$\begin{aligned} \|\mathbf{x}_{t+2} - \mathbf{x}_{t+1}\|^2 &= \sum_{i \in \mathcal{N}} \|x_{i,t+2} - x_{i,t+1}\|^2 \tag{16} \\ &\leq \sum_{i \in \mathcal{N}} (\|x_{i,t+1} - x_{i,t}\|^2 + \eta^2 \|v_i(\mathbf{x}_{t+1}) - v_i(\mathbf{x}_t)\|^2 + 2\eta(x_{i,t+1} - x_{i,t})^\top (v_i(\mathbf{x}_{t+1}) - v_i(\mathbf{x}_t))) \\ &= \|\mathbf{x}_{t+1} - \mathbf{x}_t\|^2 + 2\eta(\mathbf{x}_{t+1} - \mathbf{x}_t)^\top (\mathbf{v}(\mathbf{x}_{t+1}) - \mathbf{v}(\mathbf{x}_t)) + \eta^2 \|\mathbf{v}(\mathbf{x}_{t+1}) - \mathbf{v}(\mathbf{x}_t)\|^2. \end{aligned}$$

Since  $\mathcal{G}$  is a  $\lambda$ -cocoercive game, we have

$$(\mathbf{x}_{t+1} - \mathbf{x}_t)^\top (\mathbf{v}(\mathbf{x}_{t+1}) - \mathbf{v}(\mathbf{x}_t)) \leq -\lambda \|\mathbf{v}(\mathbf{x}_{t+1}) - \mathbf{v}(\mathbf{x}_t)\|^2.$$

Plugging the above equation into Eq. (16) together with the condition  $\eta \in (0, \lambda]$  yields that

$$\|\mathbf{x}_{t+2} - \mathbf{x}_{t+1}\|^2 \leq \|\mathbf{x}_{t+1} - \mathbf{x}_t\|^2.$$

Using the update formula in Eq. (1), we have  $\|\mathbf{v}(\mathbf{x}_{t+1})\| \leq \|\mathbf{v}(\mathbf{x}_t)\|$  for all  $t \geq 0$ .

Then we proceed to bound  $\sum_{t=0}^{+\infty} \|\mathbf{v}(\mathbf{x}_t)\|^2$ . Indeed, for any  $x_i \in \mathcal{X}_i$ , we have

$$(x_i - x_{i,t+1})^\top (x_{i,t+1} - x_{i,t} - \eta v_i(\mathbf{x}_t)) = 0.$$

Applying the equality  $a^\top b = (\|a+b\|^2 - \|a\|^2 - \|b\|^2)/2$  yields that

$$(x_{i,t+1} - x_i)^\top v_i(\mathbf{x}_t) = \frac{1}{2\eta} (\|x_{i,t} - x_{i,t+1}\|^2 + \|x_i - x_{i,t+1}\|^2 - \|x_i - x_{i,t}\|^2).$$

Summing up the resulting inequality over  $i \in \mathcal{N}$  yields that

$$(\mathbf{x}_{t+1} - \mathbf{x})^\top \mathbf{v}(\mathbf{x}_t) = \frac{1}{2\eta} (\|\mathbf{x}_t - \mathbf{x}_{t+1}\|^2 + \|\mathbf{x} - \mathbf{x}_{t+1}\|^2 - \|\mathbf{x} - \mathbf{x}_t\|^2), \quad \forall \mathbf{x} \in \mathcal{X}.$$

Letting  $\mathbf{x} = \mathbf{x}^* \in \mathcal{X}^*$ , we have

$$(\mathbf{x}_{t+1} - \mathbf{x}^*)^\top \mathbf{v}(\mathbf{x}_t) = \frac{1}{2\eta} (\|\mathbf{x}_t - \mathbf{x}_{t+1}\|^2 + \|\mathbf{x}^* - \mathbf{x}_{t+1}\|^2 - \|\mathbf{x}^* - \mathbf{x}_t\|^2). \tag{17}$$

Furthermore, we have

$$(\mathbf{x}_{t+1} - \mathbf{x}^*)^\top \mathbf{v}(\mathbf{x}_t) = (\mathbf{x}_t - \mathbf{x}^*)^\top \mathbf{v}(\mathbf{x}_t) + (\mathbf{x}_{t+1} - \mathbf{x}_t)^\top \mathbf{v}(\mathbf{x}_t).$$

Since  $\mathcal{G}$  is a  $\lambda$ -cocoercive game and  $\mathbf{v}(\mathbf{x}^*) = 0$ , we have

$$(\mathbf{x}_t - \mathbf{x}^*)^\top \mathbf{v}(\mathbf{x}_t) = (\mathbf{x}_t - \mathbf{x}^*)^\top (\mathbf{v}(\mathbf{x}_t) - \mathbf{v}(\mathbf{x}^*)) \leq -\lambda \|\mathbf{v}(\mathbf{x}_t) - \mathbf{v}(\mathbf{x}^*)\|^2 = -\lambda \|\mathbf{v}(\mathbf{x}_t)\|^2.$$

By Young's inequality we have

$$(\mathbf{x}_{t+1} - \mathbf{x}_t)^\top \mathbf{v}(\mathbf{x}_t) \leq \frac{\lambda \|\mathbf{v}(\mathbf{x}_t)\|^2}{2} + \frac{\|\mathbf{x}_{t+1} - \mathbf{x}_t\|^2}{2\lambda}.$$

Putting these pieces together yields that

$$(\mathbf{x}_{t+1} - \mathbf{x}^*)^\top \mathbf{v}(\mathbf{x}_t) \leq \frac{\|\mathbf{x}_{t+1} - \mathbf{x}_t\|^2}{2\lambda} - \frac{\lambda \|\mathbf{v}(\mathbf{x}_t)\|^2}{2}. \tag{18}$$

Plugging Eq. (18) into Eq. (17) together with the condition  $\eta \in (0, \lambda]$  yields that

$$\lambda \|\mathbf{v}(\mathbf{x}_t)\|^2 \leq \frac{\|\mathbf{x}^* - \mathbf{x}_t\|^2 - \|\mathbf{x}^* - \mathbf{x}_{t+1}\|^2}{\eta}.$$

Summing up the above inequality over  $t = 0, 1, 2, \dots$  and using the boundedness of  $\mathcal{X}$  yields that

$$\sum_{t=0}^{+\infty} \|\mathbf{v}(\mathbf{x}_t)\|^2 \leq \frac{\|\mathbf{x}^* - \mathbf{x}_0\|^2}{\eta\lambda}.$$

Note that  $\mathbf{x}^* \in \mathcal{X}^*$  is chosen arbitrarily, we let  $\mathbf{x}^* = \Pi_{\mathcal{X}^*}(\mathbf{x}_0)$  and conclude the desired inequality.

## C. Postponed Proofs in Section 4

In this section, we present the missing proofs in Section 4.

### C.1. Proof of Lemma 4.1

Using the update formula of  $x_{i,t+1}$  in Eq. (1), we have the following for any  $x_i^* \in \mathcal{X}_i^*$ :

$$\|x_{i,t+1} - x_i^*\|^2 = \|x_{i,t} + \eta_{t+1} \hat{v}_{i,t+1} - x_i^*\|^2.$$

which implies that

$$\|x_{i,t+1} - x_i^*\|^2 = \|x_{i,t} - x_i^*\|^2 + \eta_{t+1}^2 \|\hat{v}_{i,t+1}\|^2 + 2\eta_{t+1} (x_{i,t} - x_i^*)^\top \hat{v}_{i,t+1}.$$

Summing up the above inequality over  $i \in \mathcal{N}$  and rearranging yields that

$$\|\mathbf{x}_{t+1} - \mathbf{x}^*\|^2 = \|\mathbf{x}_t - \mathbf{x}^*\|^2 + 2\eta_{t+1} (\mathbf{x}_t - \mathbf{x}^*)^\top \hat{\mathbf{v}}_{t+1} + \eta_{t+1}^2 \|\hat{\mathbf{v}}_{t+1}\|^2. \quad (19)$$

Using Young's inequality, we have

$$\|\mathbf{x}_{t+1} - \mathbf{x}^*\|^2 \leq \|\mathbf{x}_t - \mathbf{x}^*\|^2 + 2\eta_{t+1}^2 \|\xi_{t+1}\|^2 + 2\eta_{t+1}^2 \|\mathbf{v}(\mathbf{x}_t)\|^2 + 2\eta_{t+1} (\mathbf{x}_t - \mathbf{x}^*)^\top (\mathbf{v}(\mathbf{x}_t) + \xi_{t+1}).$$

Since  $\mathbf{x}^* \in \mathcal{X}^*$  and  $\mathcal{G}$  is a  $\lambda$ -cocoercive game, we have  $\mathbf{v}(\mathbf{x}^*) = 0$  and

$$(\mathbf{x}_t - \mathbf{x}^*)^\top \mathbf{v}(\mathbf{x}_t) = (\mathbf{x}_t - \mathbf{x}^*)^\top (\mathbf{v}(\mathbf{x}_t) - \mathbf{v}(\mathbf{x}^*)) \leq -\lambda \|\mathbf{v}(\mathbf{x}_t) - \mathbf{v}(\mathbf{x}^*)\|^2 = -\lambda \|\mathbf{v}(\mathbf{x}_t)\|^2.$$

Putting these pieces yields the desired inequality.

### C.2. Proof of Lemma 4.2

Using the same argument as in Lemma 4.1, we have

$$\mathbb{E}[\epsilon(\mathbf{x}_{t+1}) \mid \mathcal{F}_t] - \epsilon(\mathbf{x}_t) \leq \frac{\mathbb{E}[\|\xi_{t+1}\|^2 \mid \mathcal{F}_t]}{\lambda\eta_{t+1}} + \left(1 - \frac{\lambda}{\eta_{t+1}}\right) \mathbb{E}[\|\mathbf{v}(\mathbf{x}_{t+1}) - \mathbf{v}(\mathbf{x}_t)\|^2 \mid \mathcal{F}_t].$$

Since the noisy model (2) is with relative random noise (4), we have  $\mathbb{E}[\|\xi_{t+1}\|^2 \mid \mathcal{F}_t] \leq \tau_t \|\mathbf{v}(\mathbf{x}_t)\|^2$ . Also,  $\eta_t \in (0, \lambda)$  for all  $t \geq 1$ . Therefore, we conclude that

$$\mathbb{E}[\epsilon(\mathbf{x}_{t+1}) \mid \mathcal{F}_t] - \epsilon(\mathbf{x}_t) \leq \frac{\tau_t \|\mathbf{v}(\mathbf{x}_t)\|^2}{\lambda\eta_{t+1}}.$$

Taking an expectation of both sides yields the desired inequality.

### C.3. Proof of Theorem 4.4

Using the same argument as in Theorem 4.3, we obtain that

$$\mathbb{E}[\|\mathbf{x}_{t+1} - \mathbf{x}^*\|^2 \mid \mathcal{F}_t] \leq \|\mathbf{x}_t - \mathbf{x}^*\|^2 - 2(\lambda - \bar{\eta} - \tau\bar{\eta})\eta_{t+1}\|\mathbf{v}(\mathbf{x}_t)\|^2. \quad (20)$$

Taking an expectation of both sides of Eq. (20) and rearranging yields that

$$\mathbb{E}[\epsilon(\mathbf{x}_t)] \leq \frac{1}{2(\lambda - \bar{\eta} - \tau\bar{\eta})\eta_{t+1}} (\mathbb{E}[\|\mathbf{x}_t - \mathbf{x}^*\|^2] - \mathbb{E}[\|\mathbf{x}_{t+1} - \mathbf{x}^*\|^2]). \quad (21)$$

Summing up the above inequality over  $t = 0, 1, \dots, T$  yields that

$$\mathbb{E}\left[\sum_{t=0}^T \epsilon(\mathbf{x}_t)\right] \leq \sum_{t=1}^T \left(\frac{1}{\eta_{t+1}} - \frac{1}{\eta_t}\right) \frac{\mathbb{E}[\|\mathbf{x}_t - \mathbf{x}^*\|^2]}{2(\lambda - \bar{\eta} - \tau\bar{\eta})} + \frac{\|\mathbf{x}_0 - \mathbf{x}^*\|^2}{2(\lambda - \bar{\eta} - \tau\bar{\eta})\eta_1}.$$

On the other hand, we have  $\mathbb{E}[\|\mathbf{x}_{t+1} - \mathbf{x}^*\|^2] \leq \mathbb{E}[\|\mathbf{x}_t - \mathbf{x}^*\|^2]$ . This implies that  $\mathbb{E}[\|\mathbf{x}_t - \mathbf{x}^*\|^2] \leq \|\mathbf{x}_0 - \mathbf{x}^*\|^2$  for all  $t \geq 1$ . Therefore, we conclude that

$$\begin{aligned} \mathbb{E}\left[\sum_{t=0}^T \epsilon(\mathbf{x}_t)\right] &\leq \frac{\|\mathbf{x}_0 - \mathbf{x}^*\|^2}{2(\lambda - \bar{\eta} - \tau\bar{\eta})\eta_1} + \frac{\|\mathbf{x}_0 - \mathbf{x}^*\|^2}{2(\lambda - \bar{\eta} - \tau\bar{\eta})} \sum_{t=1}^T \left(\frac{1}{\eta_{t+1}} - \frac{1}{\eta_t}\right) \\ &= \frac{\|\mathbf{x}_0 - \mathbf{x}^*\|^2}{2(\lambda - \bar{\eta} - \tau\bar{\eta})\eta_1} + \frac{\|\mathbf{x}_0 - \mathbf{x}^*\|^2}{2(\lambda - \bar{\eta} - \tau\bar{\eta})\eta_{T+1}} \\ &\leq \frac{\|\mathbf{x}_0 - \mathbf{x}^*\|^2}{(\lambda - \bar{\eta} - \tau\bar{\eta})\underline{\eta}} = O(1). \end{aligned}$$

This completes the proof.

### C.4. Proof of Theorem 4.7

Since the step-size sequence  $\{\eta_t\}_{t \geq 1}$  is decreasing and converges to zero, we define the first iconic time in our analysis as follows,

$$t^* = \max \left\{ t \geq 0 \mid \eta_{t+1} > \frac{\lambda}{2(1+\tau)} \right\} < +\infty.$$

First, we claim that  $\mathbb{E}[\|\mathbf{x}_t - \Pi_{\mathcal{X}^*}(\mathbf{x}_{t^*})\|] \leq D$  where  $D = \max_{1 \leq t \leq t^*} \mathbb{E}[\|\mathbf{x}_t - \Pi_{\mathcal{X}^*}(\mathbf{x}_{t^*})\|]$ . Indeed, it suffices to show that  $\mathbb{E}[\|\mathbf{x}_t - \Pi_{\mathcal{X}^*}(\mathbf{x}_{t^*})\|] \leq \mathbb{E}[\|\mathbf{x}_{t^*} - \Pi_{\mathcal{X}^*}(\mathbf{x}_{t^*})\|]$  holds for  $t > t^*$ . By the definition of  $t^*$ , we have  $\eta_{t+1} < \lambda/(1+\tau)$  for all  $t > t^*$ . The desired inequality follows from Eq. (21) and the fact that  $\mathbb{E}[\epsilon(\mathbf{x}_t)] \geq 0$  for all  $t > t^*$ .

Furthermore, we derive an upper bound for the term  $\sum_{t=0}^T \|\mathbf{v}(\mathbf{x}_t)\|^2$ . Using the update formula (cf. Eq. (1)) to obtain that

$$(\mathbf{x}_{t+1} - \mathbf{x}^*)^\top (\mathbf{v}(\mathbf{x}_t) + \xi_{t+1}) = \frac{1}{2\eta_{t+1}} (\|\mathbf{x}_t - \mathbf{x}_{t+1}\|^2 + \|\mathbf{x}^* - \mathbf{x}_{t+1}\|^2 - \|\mathbf{x}^* - \mathbf{x}_t\|^2).$$

Recall that  $\mathcal{G}$  is  $\lambda$ -cocoercive and the noisy model is defined with relative random noise, we have

$$\mathbb{E}[(\mathbf{x}_t - \mathbf{x}^*)^\top (\mathbf{v}(\mathbf{x}_t) + \xi_{t+1}) \mid \mathcal{F}_t] \geq \lambda \|\mathbf{v}(\mathbf{x}_t)\|^2.$$

Using Young's inequality, we have

$$\mathbb{E}[(\mathbf{x}_{t+1} - \mathbf{x}_t)^\top (\mathbf{v}(\mathbf{x}_t) + \xi_{t+1}) \mid \mathcal{F}_t] \geq -\frac{\lambda \|\mathbf{v}(\mathbf{x}_t)\|^2}{2} - \frac{(1+\tau)\mathbb{E}[\|\mathbf{x}_{t+1} - \mathbf{x}_t\|^2 \mid \mathcal{F}_t]}{\lambda}.$$

Putting these pieces together and taking an expectation yields that

$$\lambda \mathbb{E}[\|\mathbf{v}(\mathbf{x}_t)\|^2] \leq \mathbb{E}\left[\frac{\|\mathbf{x}^* - \mathbf{x}_t\|^2 - \|\mathbf{x}^* - \mathbf{x}_{t+1}\|^2}{\eta_{t+1}}\right] + \mathbb{E}\left[\left(\frac{2(1+\tau)}{\lambda} - \frac{1}{\eta_{t+1}}\right) \|\mathbf{x}_t - \mathbf{x}_{t+1}\|^2\right]. \quad (22)$$

Recall that the step-size sequence  $\{\eta_t\}_{t \geq 1}$  is nonincreasing and  $\|\mathbf{x}_t - \Pi_{\mathcal{X}^*}(\mathbf{x}_{t^*})\| \leq D$ , we let  $\mathbf{x}^* = \Pi_{\mathcal{X}^*}(\mathbf{x}_{t^*})$  in Eq. (22) and obtain that

$$\sum_{t=0}^T \lambda \mathbb{E}[\|\mathbf{v}(\mathbf{x}_t)\|^2] \leq \mathbb{E}\left[\frac{D^2}{\eta_{T+1}}\right] + \sum_{t=0}^T \mathbb{E}\left[\left(\frac{2(1+\tau)}{\lambda} - \frac{1}{\eta_{t+1}}\right) \|\mathbf{x}_t - \mathbf{x}_{t+1}\|^2\right].$$

To proceed, we define the second iconic time as

$$t_1^* = \max\left\{t \geq 0 \mid \eta_{t+1} > \frac{\lambda}{4(1+\tau)D^2 + 2(1+\tau)}\right\} > t^*.$$

It is clear that  $t_1^* < +\infty$  and  $\eta_{t+1} \leq \lambda/(2+2\tau)$  for all  $t > t_1^*$  which implies that  $(2+2\tau)/\lambda - 1/\eta_{t+1} \leq 0$ . Assume  $T$  sufficiently large without loss of generality, we have

$$\sum_{t=0}^T \lambda \mathbb{E}[\|\mathbf{v}(\mathbf{x}_t)\|^2] \leq \mathbb{E}\left[\frac{D^2}{\eta_{T+1}}\right] + \frac{2(1+\tau)}{\lambda} \left(\sum_{t=0}^{t_1^*} \mathbb{E}[\|\mathbf{x}_t - \mathbf{x}_{t+1}\|^2]\right) = \text{I} + \text{II}.$$

We also use Lemmas A.1 and A.2 from [Bach & Levy \(2019\)](#) to bound terms I and II. For convenience, we present these two lemmas here:

**Lemma C.1** *For a sequence of numbers  $a_0, a_1, \dots, a_n \in [0, a]$  and  $b \geq 0$ , the following inequality holds:*

$$\sqrt{b + \sum_{i=0}^{n-1} a_i} - \sqrt{b} \leq \sum_{i=0}^n \frac{a_i}{\sqrt{b + \sum_{j=0}^{i-1} a_j}} \leq \frac{2a}{\sqrt{b}} + 3\sqrt{a} + 3\sqrt{b + \sum_{i=0}^{n-1} a_i}.$$

**Bounding I:** We derive from the definition of  $\eta_t$  and Jensen's inequality that

$$\text{I} \leq D^2 \sqrt{\beta + \log(T+1) + \sum_{j=0}^{T-1} \mathbb{E}\left[\frac{\|\mathbf{x}_j - \mathbf{x}_{j+1}\|^2}{\eta_{j+1}^2}\right]}.$$

Since  $\mathbb{E}[\|\mathbf{x}_t - \Pi_{\mathcal{X}^*}(\mathbf{x}_{t^*})\|] \leq D$  for all  $t \geq 0$  and the notion of  $\lambda$ -cocercivity implies the notion of  $(1/\lambda)$ -Lipschitz continuity, we have

$$\mathbb{E}\left[\frac{\|\mathbf{x}_t - \mathbf{x}_{t+1}\|^2}{\eta_{t+1}^2}\right] \leq (2+2\tau) \mathbb{E}[\|\mathbf{v}(\mathbf{x}_t)\|^2] \leq \frac{(2+2\tau)\|\mathbf{x}_t - \Pi_{\mathcal{X}^*}(\mathbf{x}_{t^*})\|^2}{\lambda^2} \leq \frac{(2+2\tau)D^2}{\lambda^2}.$$

Using the first inequality in Lemma C.1, we have

$$\begin{aligned} \text{I} &\leq D^2 \sqrt{\beta + \log(T+1)} + \sum_{t=0}^T \frac{D^2 \mathbb{E}[\|\mathbf{x}_t - \mathbf{x}_{t+1}\|^2 / \eta_{t+1}^2]}{\sqrt{\beta + \log(T+1) + \sum_{j=0}^{t-1} \mathbb{E}[\|\mathbf{x}_j - \mathbf{x}_{j+1}\|^2 / \eta_{j+1}^2]}} \\ &\leq D^2 \sqrt{\beta + \log(T+1)} + \sum_{t=0}^{t_1^*} \frac{D^2 \mathbb{E}[\|\mathbf{x}_t - \mathbf{x}_{t+1}\|^2 / \eta_{t+1}^2]}{\sqrt{\beta + \log(T+1) + \sum_{j=0}^{t-1} \mathbb{E}[\|\mathbf{x}_j - \mathbf{x}_{j+1}\|^2 / \eta_{j+1}^2]}} \\ &\quad + \sum_{t=t_1^*+1}^T D^2 \eta_{t+1} \mathbb{E}\left[\frac{\|\mathbf{x}_t - \mathbf{x}_{t+1}\|^2}{\eta_{t+1}^2}\right] \\ &\leq D^2 \sqrt{\beta + \log(T+1)} + \sum_{t=0}^{t_1^*} \frac{D^2 \mathbb{E}[\|\mathbf{x}_t - \mathbf{x}_{t+1}\|^2 / \eta_{t+1}^2]}{\sqrt{\beta + \log(T+1) + \sum_{j=0}^{t-1} \mathbb{E}[\|\mathbf{x}_j - \mathbf{x}_{j+1}\|^2 / \eta_{j+1}^2]}} \\ &\quad + \sum_{t=t_1^*+1}^T (2+2\tau) D^2 \eta_{t+1} \mathbb{E}[\|\mathbf{v}(\mathbf{x}_t)\|^2]. \end{aligned} \tag{23}$$

Since  $\eta_{t+1} \leq \lambda/[4(1+\tau)D^2]$  for all  $t > t_1^*$ , we have

$$\sum_{t=t_1^*+1}^T (2+2\tau)D^2\eta_{t+1}\mathbb{E}[\|\mathbf{v}(\mathbf{x}_t)\|^2] \leq \sum_{t=t_1^*+1}^T \frac{\lambda\mathbb{E}[\|\mathbf{v}(\mathbf{x}_t)\|^2]}{2}. \quad (24)$$

Using the second inequality in Lemma 3.5, we have

$$\begin{aligned} & \sum_{t=0}^{t_1^*} \frac{D^2\mathbb{E}[\|\mathbf{x}_t - \mathbf{x}_{t+1}\|^2/\eta_{t+1}^2]}{\sqrt{\beta + \log(T+1) + \sum_{j=0}^{t-1} \mathbb{E}[\|\mathbf{x}_j - \mathbf{x}_{j+1}\|^2/\eta_{j+1}^2]}} \\ & \leq \frac{(4+4\tau)D^2}{\lambda^2\sqrt{\beta + \log(T+1)}} + \frac{3D\sqrt{2+2\tau}}{\lambda} + 3\sqrt{\beta + \log(T+1) + \sum_{j=0}^{t_1^*-1} \mathbb{E}\left[\frac{\|\mathbf{x}_j - \mathbf{x}_{j+1}\|^2}{\eta_{j+1}^2}\right]}. \end{aligned} \quad (25)$$

By the definition of  $\eta_t$ , we have

$$\begin{aligned} & \sqrt{\beta + \log(T+1) + \sum_{j=0}^{t_1^*-1} \mathbb{E}\left[\frac{\|\mathbf{x}_j - \mathbf{x}_{j+1}\|^2}{\eta_{j+1}^2}\right]} \\ & \leq \frac{1}{\eta_{t_1^*+1}} + \sqrt{\log(T+1)} < \frac{4(1+\tau)D^2 + 2(1+\tau)}{\lambda} + \sqrt{\log(T+1)}. \end{aligned} \quad (26)$$

Putting Eq. (24)-(26) together yields that

$$\begin{aligned} \text{I} & \leq D^2\sqrt{\beta + \log(T+1)} + \frac{(4+4\tau)D^2}{\lambda^2\sqrt{\beta + \log(T+1)}} + \frac{3D\sqrt{2+2\tau}}{\lambda} + \frac{12(1+\tau)D^2 + 6(1+\tau)}{\lambda} \\ & \quad + \sqrt{\log(T+1)} + \sum_{t=t_1^*+1}^T \frac{\lambda\mathbb{E}[\|\mathbf{v}(\mathbf{x}_t)\|^2]}{2}. \end{aligned}$$

**Bounding II:** Recalling that

$$\mathbb{E}\left[\frac{\|\mathbf{x}_t - \mathbf{x}_{t+1}\|^2}{\eta_{t+1}^2}\right] \leq \frac{(2+2\tau)D^2}{\lambda^2},$$

and  $\eta_t \leq 1/\beta$  for all  $t \geq 1$ , we have

$$\mathbb{E}[\|\mathbf{x}_t - \mathbf{x}_{t+1}\|^2] \leq \frac{(2+2\tau)D^2}{\lambda^2\beta^2},$$

Putting these pieces together yields that

$$\text{II} = \frac{2(1+\tau)}{\lambda} \left( \sum_{t=0}^{t_1^*} \mathbb{E}[\|\mathbf{x}_t - \mathbf{x}_{t+1}\|^2] \right) \leq \frac{4(1+\tau)^2 D^2 t_1^*}{\lambda^3 \beta^2}.$$

Therefore, we have

$$\begin{aligned} \sum_{t=0}^T \frac{\lambda\mathbb{E}[\|\mathbf{v}(\mathbf{x}_t)\|^2]}{2} & \leq D^2\sqrt{\beta + \log(T+1)} + \sqrt{\log(T+1)} + \frac{(4+4\tau)D^2}{\lambda^2\sqrt{\beta + \log(T+1)}} \\ & \quad + \frac{3D\sqrt{2+2\tau}}{\lambda} + \frac{12(1+\tau)D^2 + 6(1+\tau)}{\lambda} + \frac{4(1+\tau)^2 D^2 t_1^*}{\lambda^3 \beta^2}. \end{aligned}$$

By the definition, we have  $t_1^* < +\infty$  is uniformly bounded. To this end, we conclude that  $\sum_{t=0}^T \mathbb{E}[\|\mathbf{v}(\mathbf{x}_t)\|^2] \leq C_1 + C_2\sqrt{\log(T+1)}$ , where  $C_1 > 0$  and  $C_2 > 0$  are universal constants.

Finally, we proceed to bound the term  $\epsilon(\mathbf{x}_T)$ . Without loss of generality, we can start the sequence at a later index  $t_1^*$  since  $t_1^* < +\infty$ . This implies that  $\eta_{t+1} \leq \lambda/2(1 + \tau)$ . Using the last equation in the proof of Lemma 4.2, we have

$$\mathbb{E}[\epsilon(\mathbf{x}_T)] \leq \mathbb{E}[\epsilon(\mathbf{x}_{t_1^*})] + \sum_{j=t_1^*}^{T-1} \frac{\tau_j}{\lambda} \mathbb{E} \left[ \frac{\|\mathbf{v}(\mathbf{x}_j)\|^2}{\eta_{j+1}} \right].$$

Summing up the above inequality over  $t = t_1^*, \dots, T$  yields

$$(T - t_1^* + 1)\mathbb{E}[\epsilon(\mathbf{x}_T)] \leq \sum_{t=t_1^*}^T \mathbb{E}[\epsilon(\mathbf{x}_t)] + \frac{1}{\lambda} \left( \sum_{t=t_1^*}^{T-1} \sum_{j=t}^{T-1} \tau_j \mathbb{E} \left[ \frac{\|\mathbf{v}(\mathbf{x}_j)\|^2}{\eta_{j+1}} \right] \right).$$

Since  $\{\tau_t\}_{t \geq 0}$  is a nonincreasing sequence, we have

$$\sum_{t=t_1^*}^{T-1} \sum_{j=t}^{T-1} \tau_j \mathbb{E} \left[ \frac{\|\mathbf{v}(\mathbf{x}_j)\|^2}{\eta_{j+1}} \right] \leq \left( \sum_{t=0}^{T-1} \tau_t \right) \left( \sum_{t=t_1^*}^{T-1} \mathbb{E} \left[ \frac{\|\mathbf{v}(\mathbf{x}_j)\|^2}{\eta_{j+1}} \right] \right).$$

Using Eq. (20) and  $\eta_{t+1} \leq \lambda/2(1 + \tau)$  for all  $t > t_1^*$ , we have

$$\mathbb{E} \left[ \frac{\|\mathbf{v}(\mathbf{x}_j)\|^2}{\eta_{j+1}} \right] \leq \mathbb{E} \left[ \frac{\|\mathbf{x}_j - \mathbf{x}^*\|^2 - \|\mathbf{x}_{j+1} - \mathbf{x}^*\|^2}{\eta_{j+1}^2} \right].$$

Note that  $\{\eta_t\}_{t \geq 0}$  is a nonnegative and nonincreasing sequence and  $\mathbb{E}[\|\mathbf{x}_{j+1} - \mathbf{x}^*\|^2] \leq D^2$ . Putting these pieces together yields that

$$\begin{aligned} \sum_{t=t_1^*}^{T-1} \mathbb{E} \left[ \frac{\|\mathbf{v}(\mathbf{x}_j)\|^2}{\eta_{j+1}} \right] &\leq \mathbb{E} \left[ \frac{D^2}{\eta_T^2} \right] \leq D^2 \left( \beta + \log(T) + \sum_{t=0}^T \mathbb{E} \left[ \frac{\|\mathbf{x}_t - \mathbf{x}_{t+1}\|^2}{\eta_{t+1}^2} \right] \right) \\ &\leq D^2 \left( \beta + \log(T) + 2(1 + \tau) \sum_{t=0}^T \mathbb{E} [\|\mathbf{v}(\mathbf{x}_t)\|^2] \right) \\ &= O(\log(T)). \end{aligned}$$

Therefore, we conclude that

$$\mathbb{E}[\epsilon(\mathbf{x}_T)] \leq \frac{\sum_{t=t_1^*}^T \mathbb{E}[\epsilon(\mathbf{x}_t)]}{T - t_1^* + 1} + \frac{C \log(T + 1)}{\lambda(T - t_1^* + 1)} \left( \sum_{t=0}^{T-1} \tau_t \right) \text{ for some } C > 0.$$

This completes the proof.

## D. Postponed Proofs in Section A

In this section, we present the missing proofs in Section A.

### D.1. Proof of Lemma A.1

By the definition of  $\epsilon(\mathbf{x})$ , we have

$$\begin{aligned} \epsilon(\mathbf{x}_{t+1}) - \epsilon(\mathbf{x}_t) &= \|\mathbf{v}(\mathbf{x}_{t+1})\|^2 - \|\mathbf{v}(\mathbf{x}_t)\|^2 = (\mathbf{v}(\mathbf{x}_{t+1}) - \mathbf{v}(\mathbf{x}_t))^\top (\mathbf{v}(\mathbf{x}_{t+1}) + \mathbf{v}(\mathbf{x}_t)) \\ &= 2(\mathbf{v}(\mathbf{x}_{t+1}) - \mathbf{v}(\mathbf{x}_t))^\top \mathbf{v}(\mathbf{x}_t) + \|\mathbf{v}(\mathbf{x}_{t+1}) - \mathbf{v}(\mathbf{x}_t)\|^2. \end{aligned}$$

Using the update formula in Eq. (1), it holds that  $\mathbf{v}(\mathbf{x}_t) = \eta_{t+1}^{-1}(\mathbf{x}_{t+1} - \mathbf{x}_t) - \xi_{t+1}$ . Therefore, we have

$$\epsilon(\mathbf{x}_{t+1}) - \epsilon(\mathbf{x}_t) = \frac{2}{\eta_{t+1}} \left( (\mathbf{v}(\mathbf{x}_{t+1}) - \mathbf{v}(\mathbf{x}_t))^\top (\mathbf{x}_{t+1} - \mathbf{x}_t) - (\mathbf{v}(\mathbf{x}_{t+1}) - \mathbf{v}(\mathbf{x}_t))^\top \xi_{t+1} \right) + \|\mathbf{v}(\mathbf{x}_{t+1}) - \mathbf{v}(\mathbf{x}_t)\|^2.$$

Since  $\mathcal{G}$  is a  $\lambda$ -cocoercive game, we have

$$(\mathbf{v}(\mathbf{x}_{t+1}) - \mathbf{v}(\mathbf{x}_t))^\top (\mathbf{x}_{t+1} - \mathbf{x}_t) \leq -\lambda \|\mathbf{v}(\mathbf{x}_{t+1}) - \mathbf{v}(\mathbf{x}_t)\|^2.$$

Using Young's inequality, we have

$$-(\mathbf{v}(\mathbf{x}_{t+1}) - \mathbf{v}(\mathbf{x}_t))^\top \xi_{t+1} \leq \frac{\lambda \|\mathbf{v}(\mathbf{x}_{t+1}) - \mathbf{v}(\mathbf{x}_t)\|^2}{2} + \frac{\|\xi_{t+1}\|^2}{2\lambda}.$$

Putting these pieces together yields that

$$\epsilon(\mathbf{x}_{t+1}) - \epsilon(\mathbf{x}_t) \leq \frac{\|\xi_{t+1}\|^2}{\lambda\eta_{t+1}} + \left(1 - \frac{\lambda}{\eta_{t+1}}\right) \|\mathbf{v}(\mathbf{x}_{t+1}) - \mathbf{v}(\mathbf{x}_t)\|^2. \quad (27)$$

Taking an expectation of Eq. (27) conditioned on  $\mathcal{F}_t$  yields that

$$\mathbb{E}[\epsilon(\mathbf{x}_{t+1}) | \mathcal{F}_t] - \epsilon(\mathbf{x}_t) \leq \frac{\mathbb{E}[\|\xi_{t+1}\|^2 | \mathcal{F}_t]}{\lambda\eta_{t+1}} + \left(1 - \frac{\lambda}{\eta_{t+1}}\right) \mathbb{E}[\|\mathbf{v}(\mathbf{x}_{t+1}) - \mathbf{v}(\mathbf{x}_t)\|^2 | \mathcal{F}_t].$$

Since the noisy model (2) is with absolute random noise (4), we have  $\mathbb{E}[\|\xi_{t+1}\|^2 | \mathcal{F}_t] \leq \sigma_t^2$ . Also,  $\eta_t \in (0, \lambda)$  for all  $t \geq 1$ . Therefore, we conclude that

$$\mathbb{E}[\epsilon(\mathbf{x}_{t+1}) | \mathcal{F}_t] - \epsilon(\mathbf{x}_t) \leq \frac{\sigma_t^2}{\lambda\eta_{t+1}}.$$

Taking the expectation of both sides yields the desired inequality.

## D.2. Proof of Theorem A.2

Recalling Eq. (11) (cf. Lemma 4.1), we take the expectation of both sides conditioned on  $\mathcal{F}_t$  to obtain

$$\mathbb{E}[\|\mathbf{x}_{t+1} - \mathbf{x}^*\|^2 | \mathcal{F}_t] \leq \|\mathbf{x}_t - \mathbf{x}^*\|^2 - (2\lambda - 2\eta_{t+1})\eta_{t+1} \|\mathbf{v}(\mathbf{x}_t)\|^2 + 2\eta_{t+1}^2 \mathbb{E}[\|\xi_{t+1}\|^2 | \mathcal{F}_t] + 2\eta_{t+1} \mathbb{E}[(\mathbf{x}_t - \mathbf{x}^*)^\top \xi_{t+1} | \mathcal{F}_t].$$

Since the noisy model (2) is with absolute random noise (4) satisfying  $\sigma_t^2 \in (0, \sigma^2]$  for some  $\sigma^2 < +\infty$ , we have  $\mathbb{E}[(\mathbf{x}_t - \mathbf{x}^*)^\top \xi_{t+1} | \mathcal{F}_t] = 0$  and  $\mathbb{E}[\|\xi_{t+1}\|^2 | \mathcal{F}_t] \leq \sigma^2$ . Therefore, we have

$$\mathbb{E}[\|\mathbf{x}_{t+1} - \mathbf{x}^*\|^2 | \mathcal{F}_t] \leq \|\mathbf{x}_t - \mathbf{x}^*\|^2 - (2\lambda - 2\eta_{t+1})\eta_{t+1} \|\mathbf{v}(\mathbf{x}_t)\|^2 + 2\eta_{t+1}^2 \sigma^2.$$

Since  $\sum_{t=1}^{\infty} \eta_t^2 < \infty$ , we have  $\eta_t \rightarrow 0$  as  $t \rightarrow +\infty$ . Without loss of generality, we assume  $\eta_t \leq \lambda$  for all  $t$ . Then we have

$$\mathbb{E}[\|\mathbf{x}_{t+1} - \mathbf{x}^*\|^2 | \mathcal{F}_t] \leq \|\mathbf{x}_t - \mathbf{x}^*\|^2 + 2\eta_{t+1}^2 \sigma^2. \quad (28)$$

We let  $M_t = \|\mathbf{x}_t - \mathbf{x}^*\|^2 + 2\sigma^2(\sum_{j>t} \eta_j^2)$  and obtain that  $M_t$  is a nonnegative supermartingale. Then Doob's martingale convergence theorem shows that  $M_n$  converges to a nonnegative and integrable random variable almost surely. Let  $M_\infty = \lim_{t \rightarrow +\infty} M_t$ , it suffices to show that  $M_\infty = 0$  almost surely.

We first claim that *every neighborhood  $U$  of  $\mathcal{X}^*$  is recurrent*: there exists a subsequence  $\mathbf{x}_{t_k}$  of  $\mathbf{x}_t$  such that  $\mathbf{x}_{t_k} \rightarrow \mathcal{X}^*$  almost surely. Equivalently, there exists a Nash equilibria  $\mathbf{x}^* \in \mathcal{X}^*$  such that  $\|\mathbf{x}_{t_k} - \mathbf{x}^*\|^2 \rightarrow 0$  almost surely. To this end, we can define  $M_t$  with such Nash equilibria. Since  $\sum_{t=1}^{\infty} \eta_t^2 < \infty$ , we have  $\sum_{j>t} \eta_j^2 \rightarrow 0$  as  $t \rightarrow +\infty$  and the following statement holds almost surely:

$$\lim_{k \rightarrow +\infty} M_{t_k} = \lim_{k \rightarrow +\infty} \|\mathbf{x}_{t_k} - \mathbf{x}^*\|^2 = 0.$$

Since the whole sequence converges to  $M_\infty$  almost surely, we conclude that  $M_\infty = 0$  almost surely.

**Proof of the recurrence claim:** Let  $U$  be a neighborhood of  $\mathcal{X}^*$  and assume to the contrary that,  $\mathbf{x}_t \notin U$  for sufficiently large  $t$  with positive probability. By starting the sequence at a later index if necessary and noting that  $\sum_{t=1}^{\infty} \eta_t^2 < \infty$ , we may assume that  $\mathbf{x}_t \notin U$  and  $\eta_t \leq \lambda/2$  for all  $t$  without loss of generality. Thus, there exists some  $c > 0$  such that  $\|\mathbf{v}(\mathbf{x}_t)\|^2 \geq c$  for all  $t$ . As a result, for all  $\mathbf{x}^* \in \mathcal{X}^*$ , we let  $\psi_{t+1} = (\mathbf{x}_t - \mathbf{x}^*)^\top \xi_{t+1}$  and have

$$\|\mathbf{x}_{t+1} - \mathbf{x}^*\|^2 \leq \|\mathbf{x}_t - \mathbf{x}^*\|^2 - \lambda c \eta_{t+1} + 2\eta_{t+1} \psi_{t+1} + 2\eta_{t+1}^2 \|\xi_{t+1}\|^2.$$



Summing up the above inequality over  $t = 0, 1, \dots, T$  together with  $\theta_t = \sum_{j=1}^t \eta_j$  yields that

$$\|\mathbf{x}_{T+1} - \mathbf{x}^*\|^2 \leq \|\mathbf{x}_0 - \mathbf{x}^*\|^2 - \lambda c \theta_{T+1} + 2\theta_{T+1} \left[ \frac{\sum_{t=1}^{T+1} \eta_t \psi_t}{\theta_{T+1}} + \frac{\sum_{t=1}^{T+1} \eta_t^2 \|\xi_t\|^2}{\theta_{T+1}} \right]. \quad (29)$$

Since the noisy model (2) is with absolute random noise (4) satisfying  $\sigma_t^2 \in (0, \sigma^2]$  for some  $\sigma^2 < +\infty$ , we have  $\mathbb{E}[\psi_{t+1} | \mathcal{F}_t] = 0$ . Furthermore, we obtain by taking the expectation of both sides of Eq. (28) that

$$\mathbb{E}[\|\mathbf{x}_{t+1} - \mathbf{x}^*\|^2] \leq \mathbb{E}[\|\mathbf{x}_t - \mathbf{x}^*\|^2] + 2\eta_{t+1}^2 \sigma^2,$$

and the following inequality holds true for all  $t \geq 1$ :

$$\mathbb{E}[\|\mathbf{x}_t - \mathbf{x}^*\|^2] \leq \|\mathbf{x}_0 - \mathbf{x}^*\|^2 + 2\sigma^2 \sum_{j=1}^{\infty} \eta_j^2 < +\infty.$$

Since  $\|\mathbf{x}_t - \mathbf{x}^*\|^2 \geq 0$ , we have  $\|\mathbf{x}_t - \mathbf{x}^*\|^2 < +\infty$  almost surely. Therefore,  $\mathbb{E}[\|\psi_{t+1}\|^2 | \mathcal{F}_t] \leq \sigma^2 \|\mathbf{x}_t - \mathbf{x}^*\|^2 < +\infty$ . Then the law of large numbers for martingale differences yields that  $\theta_{T+1}^{-1} (\sum_{t=1}^{T+1} \eta_t \psi_t) \rightarrow 0$  almost surely (Hall & Heyde, 2014, Theorem 2.18). Furthermore, let  $R_t = \sum_{j=1}^t \eta_j^2 \|\xi_j\|^2$ , then  $R_t$  is a submartingale and

$$\mathbb{E}[R_t] \leq \sigma^2 \sum_{j=1}^t \eta_j^2 < \sigma^2 \sum_{j=1}^{\infty} \eta_j^2 < +\infty.$$

From Doob's martingale convergence theorem,  $R_t$  converges to some random, finite value almost surely (Hall & Heyde, 2014, Theorem 2.5). Putting these pieces together with Eq. (29) yields that  $\|\mathbf{x}_t - \mathbf{x}^*\|^2 \sim -\lambda c \tau_t \rightarrow -\infty$  almost surely, a contradiction. Therefore, we conclude that every neighborhood of  $\mathcal{X}^*$  is recurrent.

### D.3. Proof of Theorem A.3

Since  $\eta_t = c/\sqrt{t}$  for all  $t \geq 1$ , we have  $\eta_t \rightarrow 0$  and  $\eta_t \leq c$  for all  $t \geq 1$ . This implies that

$$\lambda \eta_{t+1} - \eta_{t+1}^2 \geq (\lambda - c) \eta_{t+1}. \quad (30)$$

Plugging Eq. (30) into Eq. (11) (cf. Lemma 4.1) yields that

$$\|\mathbf{x}_{t+1} - \mathbf{x}^*\|^2 \leq \|\mathbf{x}_t - \mathbf{x}^*\|^2 - 2(\lambda - c) \eta_{t+1} \|\mathbf{v}(\mathbf{x}_t)\|^2 + 2\eta_{t+1} (\mathbf{x}_t - \mathbf{x}^*)^\top \xi_{t+1} + 2\eta_{t+1}^2 \|\xi_{t+1}\|^2.$$

Using the same argument as in Theorem A.2, we have

$$\mathbb{E}[\|\mathbf{x}_{t+1} - \mathbf{x}^*\|^2 | \mathcal{F}_t] \leq \|\mathbf{x}_t - \mathbf{x}^*\|^2 - 2(\lambda - c) \eta_{t+1} \|\mathbf{v}(\mathbf{x}_t)\|^2 + 2\eta_{t+1}^2 \sigma^2. \quad (31)$$

Taking the expectation of both sides of Eq. (31) and rearranging yields that

$$\mathbb{E}[\epsilon(\mathbf{x}_t)] \leq \frac{1}{2(\lambda - c) \eta_{t+1}} (\mathbb{E}[\|\mathbf{x}_t - \mathbf{x}^*\|^2] - \mathbb{E}[\|\mathbf{x}_{t+1} - \mathbf{x}^*\|^2]) + \frac{\eta_{t+1} \sigma^2}{\lambda - c}.$$

Summing up the above inequality over  $t = 0, 1, \dots, T$  and using  $\eta_t = c/\sqrt{T+1}$  yields that

$$\mathbb{E} \left[ \sum_{t=0}^T \epsilon(\mathbf{x}_t) \right] \leq \frac{\|\mathbf{x}_0 - \mathbf{x}^*\|^2}{2(\lambda - c) \eta_1} + \sum_{t=1}^T \left( \frac{1}{\eta_{t+1}} - \frac{1}{\eta_t} \right) \frac{\mathbb{E}[\|\mathbf{x}_t - \mathbf{x}^*\|^2]}{2(\lambda - c)} + \frac{\sigma^2}{\lambda - c} \left( \sum_{t=1}^{T+1} \eta_t \right).$$

On the other hand, we have

$$\mathbb{E}[\|\mathbf{x}_{t+1} - \mathbf{x}^*\|^2] \leq \mathbb{E}[\|\mathbf{x}_t - \mathbf{x}^*\|^2] + 2\eta_{t+1}^2 \sigma^2.$$

This implies that the following inequality holds for all  $t \geq 1$ :

$$\mathbb{E}[\|\mathbf{x}_t - \mathbf{x}^*\|^2] \leq \|\mathbf{x}_0 - \mathbf{x}^*\|^2 + 2\sigma^2 \left( \sum_{j=1}^t \eta_j^2 \right) \leq \|\mathbf{x}_0 - \mathbf{x}^*\|^2 + 2\sigma^2 c^2 \log(t+1).$$

Therefore, we conclude that

$$\begin{aligned}
 \mathbb{E} \left[ \sum_{t=0}^T \epsilon(\mathbf{x}_t) \right] &\leq \frac{\|\mathbf{x}_0 - \mathbf{x}^*\|^2 + 2\sigma^2 c^2 \log(T+1)}{2(\lambda - c)} \sum_{t=1}^T \left( \frac{1}{\eta_{t+1}} - \frac{1}{\eta_t} \right) + \frac{\|\mathbf{x}_0 - \mathbf{x}^*\|^2}{2(\lambda - c)\eta_1} + \frac{\sigma^2}{\lambda - c} \left( \sum_{t=1}^{T+1} \eta_t \right) \\
 &\leq \frac{\sqrt{T+1}(\|\mathbf{x}_0 - \mathbf{x}^*\|^2 + 2\sigma^2 c^2 \log(T+1))}{2c(\lambda - c)} + \frac{\|\mathbf{x}_0 - \mathbf{x}^*\|^2}{2c(\lambda - c)} + \frac{\sigma^2 c \sqrt{T+1}}{\lambda - c} \\
 &= O\left(\sqrt{T+1} \log(T+1)\right).
 \end{aligned}$$

This completes the proof.

#### D.4. Proof of Theorem A.4

Using Lemma A.1, we have

$$\mathbb{E}[\epsilon(\mathbf{x}_T)] \leq \mathbb{E}[\epsilon(\mathbf{x}_t)] + \frac{1}{\lambda} \left( \sum_{j=t}^{T-1} \frac{\sigma_j^2}{\eta_{j+1}} \right) \leq \mathbb{E}[\epsilon(\mathbf{x}_t)] + \frac{1}{\lambda \underline{\eta}} \left( \sum_{j=t}^{T-1} \sigma_j^2 \right).$$

Summing up the above inequality over  $t = 0, 1, \dots, T$  yields that

$$(T+1)\mathbb{E}[\epsilon(\mathbf{x}_T)] \leq \sum_{t=0}^T \mathbb{E}[\epsilon(\mathbf{x}_t)] + \frac{1}{\lambda} \left( \sum_{t=0}^{T-1} \sum_{j=t}^{T-1} \frac{\sigma_j^2}{\eta_{j+1}} \right) \leq \sum_{t=0}^T \mathbb{E}[\epsilon(\mathbf{x}_t)] + \frac{1}{\lambda \underline{\eta}} \left( \sum_{t=0}^{T-1} (t+1) \sigma_t^2 \right).$$

On the other hand, the derivation in Theorem A.3 implies that

$$\begin{aligned}
 \mathbb{E} \left[ \sum_{t=0}^T \epsilon(\mathbf{x}_t) \right] &\leq \frac{\|\mathbf{x}_0 - \mathbf{x}^*\|^2}{2(\lambda - \bar{\eta})\eta_1} + \sum_{t=1}^T \left( \frac{1}{\eta_{t+1}} - \frac{1}{\eta_t} \right) \frac{\mathbb{E}[\|\mathbf{x}_t - \mathbf{x}^*\|^2]}{2(\lambda - \bar{\eta})} + \frac{1}{\lambda - \bar{\eta}} \left( \sum_{t=1}^{T+1} \eta_t \sigma_t^2 \right) \\
 &\leq \frac{\|\mathbf{x}_0 - \mathbf{x}^*\|^2}{2(\lambda - \bar{\eta})\eta_1} + \sum_{t=1}^T \left( \frac{1}{\eta_{t+1}} - \frac{1}{\eta_t} \right) \frac{\mathbb{E}[\|\mathbf{x}_t - \mathbf{x}^*\|^2]}{2(\lambda - \bar{\eta})} + \frac{\bar{\eta}}{\lambda - \bar{\eta}} \left( \sum_{t=1}^{T+1} \sigma_t^2 \right).
 \end{aligned}$$

On the other hand, we have

$$\mathbb{E}[\|\mathbf{x}_{t+1} - \mathbf{x}^*\|^2] \leq \mathbb{E}[\|\mathbf{x}_t - \mathbf{x}^*\|^2] + 2\eta_{t+1}^2 \sigma_t^2.$$

This implies that the following inequality holds for all  $t \geq 1$ :

$$\mathbb{E}[\|\mathbf{x}_t - \mathbf{x}^*\|^2] \leq \|\mathbf{x}_0 - \mathbf{x}^*\|^2 + 2\bar{\eta}^2 \left( \sum_{j=1}^t \sigma_j^2 \right).$$

Therefore, we conclude that

$$\begin{aligned}
 \mathbb{E} \left[ \sum_{t=0}^T \epsilon(\mathbf{x}_t) \right] &\leq \frac{\|\mathbf{x}_0 - \mathbf{x}^*\|^2 + 2\bar{\eta}^2 (\sum_{t=1}^T \sigma_t^2)}{2(\lambda - \bar{\eta})} \sum_{t=1}^T \left( \frac{1}{\eta_{t+1}} - \frac{1}{\eta_t} \right) + \frac{\|\mathbf{x}_0 - \mathbf{x}^*\|^2}{2(\lambda - \bar{\eta})\eta_1} + \frac{\bar{\eta}}{\lambda - \bar{\eta}} \left( \sum_{t=1}^{T+1} \sigma_t^2 \right) \\
 &\leq \frac{\|\mathbf{x}_0 - \mathbf{x}^*\|^2 + 2\bar{\eta}^2 (\sum_{t=1}^T \sigma_t^2)}{2(\lambda - \bar{\eta})\underline{\eta}} + \frac{\|\mathbf{x}_0 - \mathbf{x}^*\|^2}{2(\lambda - \bar{\eta})\underline{\eta}} + \frac{\bar{\eta}}{\lambda - \bar{\eta}} \left( \sum_{t=1}^{T+1} \sigma_t^2 \right) \\
 &\leq \frac{\|\mathbf{x}_0 - \mathbf{x}^*\|^2}{(\lambda - \bar{\eta})\underline{\eta}} + \left( 1 + \frac{\bar{\eta}}{\underline{\eta}} \right) \frac{\bar{\eta}}{\lambda - \bar{\eta}} \left( \sum_{t=1}^{T+1} \sigma_t^2 \right) \\
 &\leq \frac{\|\mathbf{x}_0 - \mathbf{x}^*\|^2}{(\lambda - \bar{\eta})\underline{\eta}} + \left( 1 + \frac{\bar{\eta}}{\underline{\eta}} \right) \frac{\bar{\eta}}{\lambda - \bar{\eta}} \left( \sum_{t=1}^{T+1} (t+1) \sigma_t^2 \right).
 \end{aligned}$$

Putting these pieces together yields that

$$\begin{aligned}
 \mathbb{E}[\epsilon(\mathbf{x}_T)] &\leq \frac{1}{T+1} \left[ \sum_{t=0}^T \mathbb{E}[\epsilon(\mathbf{x}_t)] + \frac{1}{\lambda \underline{\eta}} \left( \sum_{t=0}^{T-1} (t+1) \sigma_t^2 \right) \right] \\
 &\leq \frac{1}{T+1} \left( \frac{\|\mathbf{x}_0 - \mathbf{x}^*\|^2}{(\lambda - \bar{\eta}) \underline{\eta}} + \left( \frac{1}{\lambda \underline{\eta}} + \left( 1 + \frac{\bar{\eta}}{\underline{\eta}} \right) \frac{\bar{\eta}}{\lambda - \bar{\eta}} \right) \left( \sum_{t=1}^{T+1} (t+1) \sigma_t^2 \right) \right) \\
 &\stackrel{\text{Eq. (15)}}{=} O(a(T)).
 \end{aligned}$$

This completes the proof.
